# Supplementary material for: Novel neodymium-based porphyrin metal–organic frameworks for dual-mode detection of iron ions
Source: Royal Society of Chemistry journal article supplement (doi:10.1039/d5dt02758f), 2025-12-15

Supporting information for

**A novel neodymium-based porphyrin metal-organic frameworks for  
dual-mode detection of iron ions**

**Yan Wan,<sup>b</sup> Congping Zhao,<sup>b</sup> Yan Zhou,<sup>a</sup> Lin Li,<sup>a</sup> Xianfeng Wang,<sup>d</sup> Tao Zhong,<sup>a</sup> Yan Yang,<sup>a</sup>  
Huan Li,<sup>a</sup> Yi Yang<sup>\*\*a,c</sup> Jing Liu<sup>\*a,c</sup>**

<sup>a</sup>School of Public Health, Southwest Medical University, Sichuan, 646000, China

<sup>b</sup>Leshan Center for Disease Control and Prevention, Sichuan, 614000, China

<sup>c</sup>Environmental health effects and risk assessment Key Laboratory of Luzhou, Sichuan, 646000,  
China

<sup>d</sup>Wuxi School of Medicine, Jiangnan University, Wuxi, 214122, China

\* Corresponding author. School of Public Health, Southwest Medical University, Environmental  
health effects and risk assessment Key Laboratory of Luzhou, Sichuan, 646000, China

\*\* Corresponding author. School of Public Health, Southwest Medical University, Environmental  
health effects and risk assessment Key Laboratory of Luzhou, Sichuan, 646000, China

E-mail for corresponding author: liujing.1583@163.com (Jing Liu)

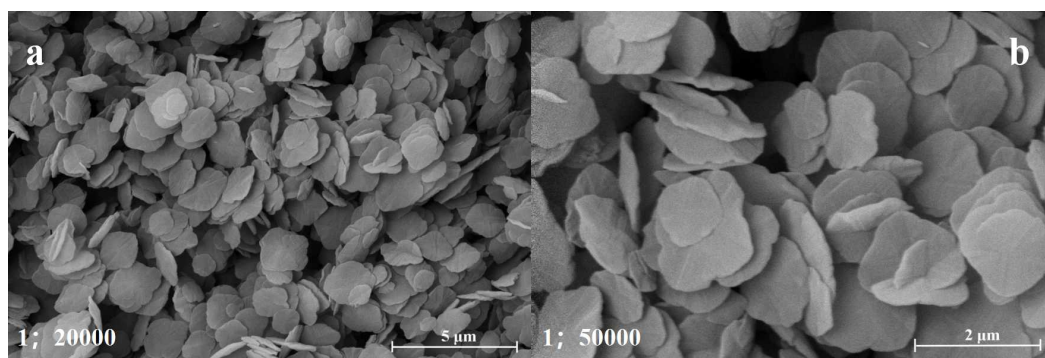

Fig. S1 SEM images of NTMNs

## Figures

**Fig. S1**

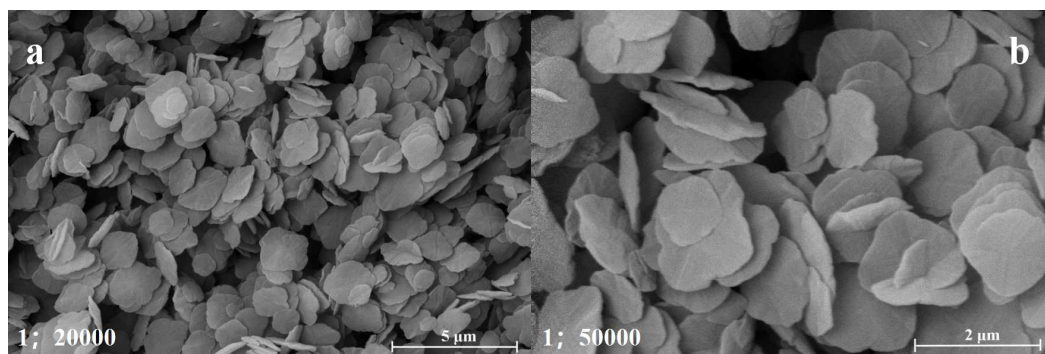

Supplement: d5dt02758f1.pdf [file d5dt02758f1.pdf]
